# Supplementary material
Source: Springer Nature journal article supplement (https://www.springermedizin.de/resource/supplementary/12958_2011_960_MOESM3_ESM.pdf/9566592)

A

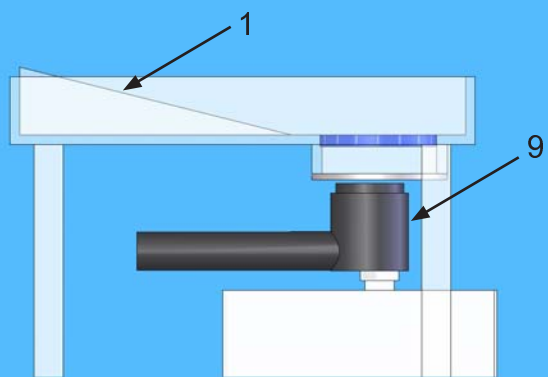

B

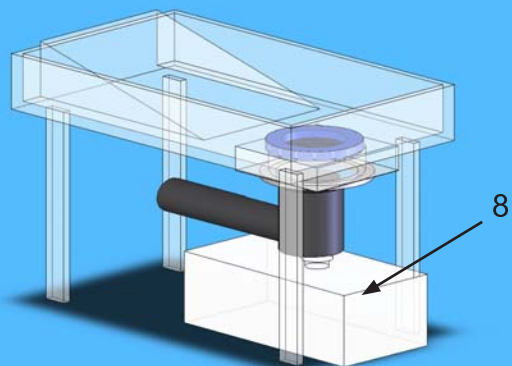

C

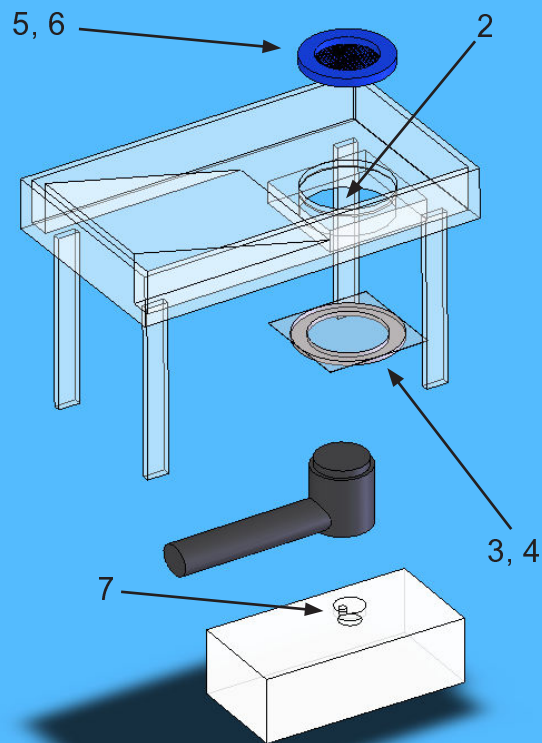

Supplement: MOESM3 [file 9566592]
